# Supplementary material
Source: PubMed Central journal article supplement (PMC2873149)
Supplement: NIHMS185266-supplement-1.pdf [file NIHMS185266-supplement-1.pdf]

Supplementary Table 1. Characteristics of variation in sex-steroid receptors (ESR1, ESR2, and PGR) and hormone-synthesizing genes (CYP19A1 and HSD17B2) in the Women's Health Study.

| Gene/<br>Variant | LD<br>block # | Region   | Base change | Cases allele<br>(%) | Controls allele<br>(%) | $P_{HWE}^*$ | $FDR P$ |
|------------------|---------------|----------|-------------|---------------------|------------------------|-------------|---------|
| <b>ESR1</b>      |               |          |             |                     |                        |             |         |
| rs2077647        | --            | Exon 1   | T → C       | 47                  | 47                     | 0.41        | 0.90    |
| rs6902771        | 1             | Intron 1 | C → T       | 48                  | 45                     | 0.78        | 0.95    |
| rs2234693        | 1             | Intron 1 | T → C       | 48                  | 44                     | 0.82        | 0.95    |
| rs9340799        | 1             | Intron 1 | A → G       | 39                  | 34                     | 0.71        | 0.95    |
| rs712221         | --            | Intron 2 | A → T       | 43                  | 40                     | 0.20        | 0.88    |
| rs1709183        | --            | Intron 2 | T → C       | 30                  | 27                     | 0.39        | 0.90    |
| rs2347923        | 2             | Intron 3 | A → C       | 29                  | 31                     | 0.17        | 0.88    |
| rs12199722       | 2             | Intron 3 | A → G       | 35                  | 31                     | 0.86        | 0.96    |
| rs6912184        | 3             | Intron 3 | A → G       | 20                  | 22                     | 0.85        | 0.96    |
| rs4583998        | 3             | Intron 3 | G → A       | 30                  | 31                     | 0.30        | 0.88    |
| rs1801132        | 3             | Exon 4   | C → G       | 20                  | 22                     | 0.61        | 0.93    |
| rs3020314        | 4             | Intron 4 | T → C       | 29                  | 33                     | 0.30        | 0.88    |
| rs3020401        | 4             | Intron 4 | A → G       | 28                  | 31                     | 0.28        | 0.88    |
| rs2982685        | 5             | Intron 4 | A → G       | 33                  | 37                     | 0.52        | 0.93    |
| rs2982683        | 5             | Intron 4 | C → T       | 33                  | 29                     | 0.60        | 0.93    |
| rs3020407        | --            | Intron 4 | A → G       | 30                  | 32                     | 0.25        | 0.88    |
| rs9340954        | --            | Intron 4 | T → G       | 24                  | 26                     | 0.78        | 0.95    |
| rs2982712        | 6             | Intron 5 | T → G       | 42                  | 41                     | 0.004       | 0.41    |
| rs3020434        | 6             | Intron 5 | C → T       | 16                  | 17                     | 0.40        | 0.90    |
| rs3020363        | 6             | Intron 5 | T → C       | 33                  | 33                     | 0.10        | 0.88    |
| rs3020370        | --            | Intron 5 | G → C       | 21                  | 22                     | 0.87        | 0.96    |
| rs3798577        | --            | 3' UTR   | T → C       | 46                  | 48                     | 0.33        | 0.90    |
| <b>ESR2</b>      |               |          |             |                     |                        |             |         |
| rs1255953        | --            | Exon 5   | T → C       | 18                  | 14                     | 0.51        | 0.77    |
| rs928554         | 1             | 3' UTR   | T → C       | 46                  | 44                     | 0.32        | 0.77    |
| rs1256031        | 1             | Intron 3 | T → C       | 49                  | 46                     | 0.31        | 0.77    |
| rs3020450        | 1             | 5' UTR   | G → A       | 33                  | 32                     | 0.59        | 0.77    |
| <b>PGR</b>       |               |          |             |                     |                        |             |         |
| rs473409         | 1             | 3' UTR   | A → C       | 26                  | 23                     | 0.87        | 0.92    |
| rs484389         | --            | 3' UTR   | T → C       | 23                  | 22                     | 0.60        | 0.91    |
| rs500760         | --            | 3' UTR   | A → G       | 23                  | 22                     | 0.66        | 0.91    |
| rs1042839        | --            | Exon 5   | C → T       | 17                  | 14                     | 0.72        | 0.91    |
| rs545835         | 1             | Intron 4 | C → T       | 48                  | 49                     | 0.62        | 0.91    |
| rs1042838        | 1             | Exon 4   | G → T       | 17                  | 14                     | 0.71        | 0.91    |
| rs1824128        | 1             | Intron 3 | C → A       | 19                  | 15                     | 0.36        | 0.91    |
| rs477151         | 2             | Intron 3 | T → C       | 26                  | 28                     | 0.49        | 0.91    |
| rs559700         | 2             | Intron 2 | A → G       | 17                  | 14                     | 0.82        | 0.91    |
| rs516693         | 2             | Intron 2 | G → A       | 13                  | 12                     | 0.72        | 0.91    |
| rs508533         | 2             | Intron 2 | A → C       | 37                  | 38                     | 0.79        | 0.91    |
| rs572483         | 3             | Intron 2 | A → G       | 32                  | 34                     | 0.98        | 0.99    |
| rs543215         | 3             | Intron 2 | T → C       | 19                  | 17                     | 0.77        | 0.91    |
| rs613120         | 3             | Intron 2 | T → C       | 51                  | 48                     | 0.35        | 0.91    |
| rs529359         | 4             | Intron 2 | A → G       | 38                  | 38                     | 0.65        | 0.91    |
| rs481775         | 4             | Intron 2 | C → T       | 32                  | 35                     | 0.94        | 0.98    |
| rs1379130        | --            | Exon 1   | G → A       | 31                  | 35                     | 0.99        | 0.99    |
| rs3740753        | 4             | Exon 1   | C → G       | 17                  | 14                     | 0.45        | 0.91    |
| <b>CYP19A1</b>   |               |          |             |                     |                        |             |         |

|                |    |          |       |    |    |      |      |
|----------------|----|----------|-------|----|----|------|------|
| rs4646         | 1  | Exon 10  | G → T | 26 | 27 | 0.51 | 0.93 |
| rs10046        | 1  | Exon 10  | T → C | 46 | 53 | 0.97 | 0.98 |
| rs2414096      | 1  | Intron 2 | A → G | 52 | 47 | 0.50 | 0.93 |
| rs727479       | 1  | Intron 2 | T → G | 38 | 35 | 0.57 | 0.93 |
| rs1008805      | 2  | Intron 1 | T → C | 46 | 43 | 0.86 | 0.98 |
| rs749292       | 2  | Intron 1 | C → T | 41 | 43 | 0.80 | 0.98 |
| rs936306       | 3  | Intron 1 | G → A | 14 | 15 | 0.95 | 0.98 |
| rs3751591      | 3  | Intron 1 | T → C | 18 | 17 | 0.97 | 0.98 |
| rs1004984      | 4  | Intron 1 | C → T | 36 | 35 | 0.26 | 0.91 |
| rs2445762      | 4  | Intron 1 | A → G | 25 | 26 | 0.57 | 0.93 |
| rs2470144      | 4  | Intron 1 | A → G | 44 | 46 | 0.79 | 0.98 |
| rs2445765      | 4  | 5' UTR   | C → G | 15 | 16 | 0.13 | 0.88 |
| rs2446405      | 4  | 5' UTR   | A → T | 14 | 17 | 0.13 | 0.88 |
| <b>HSD17B2</b> |    |          |       |    |    |      |      |
| rs4445895      | 1  | Exon 1   | C → T | 38 | 35 | 0.87 | 0.93 |
| rs6564961      | 1  | Intron 1 | A → G | 40 | 37 | 0.88 | 0.93 |
| rs2911422      | 1  | Intron 3 | G → C | 48 | 42 | 0.18 | 0.51 |
| rs2042429      | 1  | Intron 3 | T → C | 50 | 44 | 0.33 | 0.62 |
| rs723012       | 1  | Intron 3 | C → T | 33 | 37 | 0.04 | 0.25 |
| rs9939740      | -- | Intron 3 | A → G | 36 | 41 | 0.22 | 0.57 |

\*. P values for tests of Hardy-Weinberg equilibrium (HWE) among controls.
